# Supplementary material for: CD133 Modulate HIF-1α Expression under Hypoxia in EMT Phenotype Pancreatic Cancer Stem-Like Cells
Source: PubMed Central journal article supplement (PMC4964401; doi:10.3390/ijms17071025), 2016-06-28
Supplement: ijms-17-01025-s001.pdf [file ijms-17-01025-s001.pdf]

## Supplementary Materials: CD133 Modulate HIF-1 $\alpha$ Expression under Hypoxia in EMT Phenotype Pancreatic Cancer Stem-Like Cells

Koki Maeda, Qiang Ding, Makoto Yoshimitsu, Taisaku Kuwahata, Yumi Miyazaki, Koichirou Tsukasa, Tomomi Hayashi, Hiroyuki Shinchi, Shoji Natsugoe and Sonshin Takao

**Table S1.** DNA microarray analysis of epithelial mesenchymal transition (EMT)-related genes. The data represent a comparison of EMT-related genes expression between Capan1M9 and shCD133M9 cells by DNA microarray.

| Gene Symbol     | Description                                                                                                                                                      | Signal      |             |             |
|-----------------|------------------------------------------------------------------------------------------------------------------------------------------------------------------|-------------|-------------|-------------|
|                 |                                                                                                                                                                  | M9          | shCD133M9   | shSlugM9    |
| <i>VIM</i>      | Homo sapiens vimentin (VIM), mRNA [NM_003380]                                                                                                                    | 269.405575  | 14.5888225  | 92.51209401 |
| <i>FN1</i>      | Homo sapiens fibronectin 1 (FN1), transcript variant 7, mRNA [NM_054034]                                                                                         | 23.34250625 | 3.9644705   | 5.527785483 |
| <i>SNAI2</i>    | Homo sapiens snail homolog 2 (Drosophila) (SNAI2), mRNA [NM_003068]                                                                                              | 56.742035   | 7.067408625 | 21.28878    |
| <i>CDH2</i>     | Homo sapiens cadherin 2, type 1, N-cadherin (neuronal) (CDH2), mRNA [NM_001792]                                                                                  | 695.0580281 | 257.1971135 | 241.3556833 |
| <i>NOTCH1</i>   | Homo sapiens notch 1 (NOTCH1), mRNA [NM_017617]                                                                                                                  | 675.14325   | 247.6606125 | 291.6518125 |
| <i>IL1RN</i>    | Homo sapiens interleukin 1 receptor antagonist (IL1RN), transcript variant 4, mRNA [NM_173843]                                                                   | 15554.5     | 4020.711    | 10842.87788 |
| <i>COL5A2</i>   | Homo sapiens collagen, type V, $\alpha$ 2 (COL5A2), mRNA [NM_000393]                                                                                             | 115.58975   | 87.9014825  | 40.24735375 |
| <i>KRT14</i>    | Homo sapiens keratin 14 (KRT14), mRNA [NM_000526]                                                                                                                | 723.035525  | 327.4258219 | 482.6625007 |
| <i>MITF</i>     | Homo sapiens microphthalmia-associated transcription factor (MITF), transcript variant 1, mRNA [NM_198159]                                                       | 1677.09075  | 554.6804375 | 1361.508872 |
| <i>ITGAV</i>    | Homo sapiens integrin, $\alpha$ V (vitronectin receptor, $\alpha$ polypeptide, antigen CD51) (ITGAV), transcript variant 1, mRNA [NM_002210]                     | 10146.99361 | 4141.590421 | 7773.431025 |
| <i>TGFB2</i>    | Homo sapiens transforming growth factor, $\beta$ 2 (TGFB2), transcript variant 2, mRNA [NM_003238]                                                               | 654.2277412 | 283.6823875 | 505.3588487 |
| <i>MSN</i>      | Homo sapiens moesin (MSN), mRNA [NM_002444]                                                                                                                      | 536.432725  | 479.7053125 | 186.072775  |
| <i>FZD7</i>     | Homo sapiens frizzled family receptor 7 (FZD7), mRNA [NM_003507]                                                                                                 | 817.834408  | 320.1853875 | 734.7740634 |
| <i>TMEM132A</i> | Homo sapiens transmembrane protein 132A (TMEM132A), transcript variant 1, mRNA [NM_017870]                                                                       | 11660.30125 | 6088.394125 | 9303.731625 |
| <i>ITGB1</i>    | Homo sapiens integrin, $\beta$ 1 (fibronectin receptor, $\beta$ polypeptide, antigen CD29 includes MDF2, MSK12) (ITGB1), transcript variant 1E, mRNA [NM_133376] | 1941.083113 | 1362.83509  | 1243.129072 |

Table S1. Cont.

| Gene Symbol     | Description                                                                                                                                                   | Signal      |             |             |
|-----------------|---------------------------------------------------------------------------------------------------------------------------------------------------------------|-------------|-------------|-------------|
|                 |                                                                                                                                                               | M9          | shCD133M9   | shSlugM9    |
| <i>KRT7</i>     | Homo sapiens keratin 7 (KRT7), mRNA [NM_005556]                                                                                                               | 205747.9875 | 108527.3875 | 183474.725  |
| <i>MMP9</i>     | Homo sapiens matrix metalloproteinase 9 (gelatinase B, 92 kDa gelatinase, 92 kDa type IV collagenase) (MMP9), mRNA [NM_004994]                                | 181.6547384 | 75.3131224  | 183.5654288 |
| <i>FOXC2</i>    | Homo sapiens forkhead box C2 (MFH-1, mesenchyme forkhead 1) (FOXC2), mRNA [NM_005251]                                                                         | 23.70205    | 6.620899    | 27.35915625 |
| <i>ZEB1</i>     | Homo sapiens zinc finger E-box binding homeobox 1 (ZEB1), transcript variant 1, mRNA [NM_001128128]                                                           | 26.05846125 | 16.5438525  | 25.28960125 |
| <i>CAV2</i>     | Homo sapiens caveolin 2 (CAV2), transcript variant 1, mRNA [NM_001233]                                                                                        | 607.0546613 | 605.8412483 | 369.5984673 |
| <i>STEAP1</i>   | Homo sapiens six transmembrane epithelial antigen of the prostate 1 (STEAP1), mRNA [NM_012449]                                                                | 2937.4265   | 1382.112792 | 3367.506625 |
| <i>TSPAN13</i>  | Homo sapiens tetraspanin 13 (TSPAN13), mRNA [NM_014399]                                                                                                       | 2238.7915   | 1407.64225  | 2330.256879 |
| <i>SNAI1</i>    | Homo sapiens snail homolog 1 (Drosophila) (SNAI1), mRNA [NM_005985]                                                                                           | 128.0035525 | 104.0177297 | 117.4491913 |
| <i>EGFR</i>     | Homo sapiens epidermal growth factor receptor (EGFR), transcript variant 1, mRNA [NM_005228]                                                                  | 289.3324763 | 219.9080181 | 286.204883  |
| <i>GNG11</i>    | Homo sapiens guanine nucleotide binding protein (G protein), gamma 11 (GNG11), mRNA [NM_004126]                                                               | 202.7561704 | 139.2596253 | 217.1940395 |
| <i>PLEK2</i>    | Homo sapiens pleckstrin 2 (PLEK2), mRNA [NM_016445]                                                                                                           | 5031.790125 | 3903.478625 | 5310.925875 |
| <i>PTK2</i>     | Homo sapiens PTK2 protein tyrosine kinase 2 (PTK2), transcript variant 1, mRNA [NM_153831]                                                                    | 848.3526125 | 502.7078875 | 1069.863417 |
| <i>ITGA5</i>    | Homo sapiens integrin, $\alpha$ 5 (fibronectin receptor, $\alpha$ polypeptide) (ITGA5), mRNA [NM_002205]                                                      | 174.6968625 | 136.31525   | 190.7827375 |
| <i>F11R</i>     | Homo sapiens F11 receptor (F11R), mRNA [NM_016946]                                                                                                            | 28024.39125 | 26077.105   | 27275.0425  |
| <i>SERPINE1</i> | Homo sapiens serpin peptidase inhibitor, clade E (nexin, plasminogen activator inhibitor type 1), member 1 (SERPINE1), transcript variant 1, mRNA [NM_000602] | 13.14648905 | 15.30358359 | 10.38988336 |
| <i>CDH1</i>     | Homo sapiens cadherin 1, type 1, E-cadherin (epithelial) (CDH1), mRNA [NM_004360]                                                                             | 9811.239324 | 10611.02271 | 8684.681088 |
| <i>ILK</i>      | Homo sapiens integrin-linked kinase (ILK), transcript variant 3, mRNA [NM_001014795]                                                                          | 2126.26939  | 1718.618748 | 2515.711173 |
| <i>CAMK2N1</i>  | Homo sapiens calcium/calmodulin-dependent protein kinase II inhibitor 1 (CAMK2N1), mRNA [NM_018584]                                                           | 5600.74683  | 4019.404653 | 7821.859197 |
| <i>FGFBP1</i>   | Homo sapiens fibroblast growth factor binding protein 1 (FGFBP1), mRNA [NM_005130]                                                                            | 2031.222625 | 3695.347    | 919.887475  |
| <i>ESR1</i>     | Homo sapiens estrogen receptor 1 (ESR1), transcript variant 1, mRNA [NM_000125]                                                                               | 28.5033525  | 40.367195   | 25.51461    |

Table S1. Cont.

| Gene Symbol   | Description                                                                                                                    | Signal      |             |             |
|---------------|--------------------------------------------------------------------------------------------------------------------------------|-------------|-------------|-------------|
|               |                                                                                                                                | M9          | shCD133M9   | shSlugM9    |
| <i>TGFB1</i>  | Homo sapiens transforming growth factor, $\beta$ 1 (TGF $\beta$ 1), mRNA [NM_000660]                                           | 820.4119617 | 897.561245  | 1017.6701   |
| <i>OCLN</i>   | Homo sapiens occludin (OCLN), transcript variant 1, mRNA [NM_002538]                                                           | 432.1801625 | 643.668125  | 367.4899    |
| <i>SNAI3</i>  | Homo sapiens snail homolog 3 (Drosophila) (SNAI3), mRNA [NM_178310]                                                            | 86.723435   | 104.0595921 | 109.3763113 |
| <i>TIMP1</i>  | Homo sapiens TIMP metalloproteinase inhibitor 1 (TIMP1), mRNA [NM_003254]                                                      | 3068.434625 | 3628.826375 | 4213.724439 |
| <i>DSP</i>    | Homo sapiens desmoplakin (DSP), transcript variant 1, mRNA [NM_004415]                                                         | 3972.784375 | 9276.67825  | 2570.304472 |
| <i>IGFBP4</i> | Homo sapiens insulin-like growth factor binding protein 4 (IGFBP4), mRNA [NM_001552]                                           | 446.6832875 | 706.3216625 | 666.6703875 |
| <i>ERBB3</i>  | Homo sapiens v-erb-b2 erythroblastic leukemia viral oncogene homolog 3 (avian) (ERBB3), transcript variant 1, mRNA [NM_001982] | 3384.575438 | 6670.921    | 4453.137855 |
| <i>JAG1</i>   | Homo sapiens jagged 1 (JAG1), mRNA [NM_000214]                                                                                 | 76.85549875 | 206.2662629 | 72.55606    |
| <i>CALD1</i>  | Homo sapiens caldesmon 1 (CALD1), transcript variant 1, mRNA [NM_033138]                                                       | 146.2501125 | 527.5935875 | 71.47478    |
| <i>DSC2</i>   | Homo sapiens desmocollin 2 (DSC2), transcript variant Dsc2a, mRNA [NM_024422]                                                  | 147.7242    | 724.674875  | 140.49815   |
| <i>RGS2</i>   | Homo sapiens regulator of G-protein signaling 2, 24 kDa (RGS2), mRNA [NM_002923]                                               | 308.1948151 | 1625.207484 | 332.2243848 |
| <i>TCF4</i>   | Homo sapiens transcription factor 4 (TCF4), transcript variant 2, mRNA [NM_003199]                                             | 34.24982982 | 192.5447125 | 25.61543875 |
| <i>WNT11</i>  | Homo sapiens wingless-type MMTV integration site family, member 11 (WNT11), mRNA [NM_004626]                                   | 71.56063    | 396.12025   | 94.65079553 |

**Table S2.** Primers list for real-time reverse transcriptase-polymerase chain reaction.

| Genes             | Primer Sets Forward (5'-3') | Primer Sets Reverse (5'-3') |
|-------------------|-----------------------------|-----------------------------|
| <i>HIF1A</i>      | CCACAGGACAGTACAGGATG        | TCAAGTCGTGCTGAATAATACC      |
| <i>N-cadherin</i> | CATCAACCGGCTTAATGGTG        | ACTTTCACACGCAGGATGGA        |
| <i>Snail</i>      | TCGGAAGCCTAACTACAGCGA       | AGATGAGCATTGGCAGCGAG        |
| <i>Slug</i>       | AAGCATTTC AACGCCTCCAAA      | GGATCTCTGGTTGTGGTATGACA     |
| <i>GAPDH</i>      | CAGGAGCGAGATCCCT            | GGTGCTAAGCAGTTGGT           |

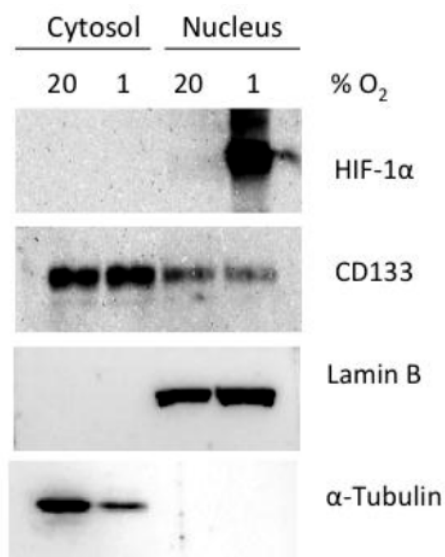

**Figure S1.** CD133 expression both in nucleus and cytosol. CD133 expresses both in nucleus and cytosol. Western blot assays of HIF-1 $\alpha$ , CD133, Lamin B and  $\alpha$ -tubulin protein in nuclear and cytosolic lysates prepared from Capan1M9 cells exposed to 20% or 1% O<sub>2</sub> for 6 h. Anti-CD133 antibody directed against AC133, an extracellular epitope of CD133 was detected not only in cytosol but also in nucleus. This result suggests CD133 might exist in nucleus.

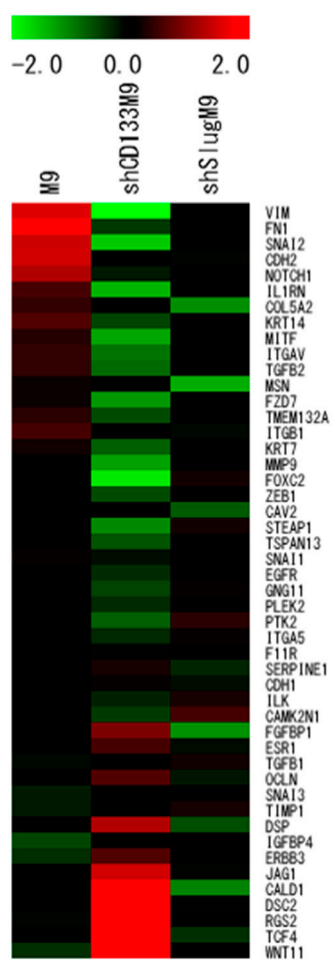

**Figure S2.** A heatmap of the DNA microarray demonstrates the distinct molecular profiles of Capan1M9 and shCD133M9 cells.
